# Supplementary material for: Poly-ligand profiling differentiates trastuzumab-treated breast cancer patients according to their outcomes
Source: PubMed Central journal article supplement (PMC5865185; doi:10.1038/s41467-018-03631-z), 2018-03-23
Supplement: 41467_2018_3631_MOESM3_ESM.pdf [file 41467_2018_3631_MOESM3_ESM.pdf]

## **Description of Additional Supplementary Files**

File Name: Supplementary Data 1

Description: Cases assignment for enrichment, their treatment history, clinical and demographic details.

File Name: Supplementary Data 2

Description: Comparison between trastuzumab test set and non-qualified set.

File Name: Supplementary Data 3

Description: Next Generation Sequencing data for the unenriched and enriched ssDNA libraries.

File Name: Supplementary Data 4

Description: Test set cases: treatment histories, origin, clinical and demographic details.

File Name: Supplementary Data 5

Description: Staining intensity scores, algorithm score, and the test interpretation for the trastuzumab test set cases.

File Name: Supplementary Data 6

Description: Histological scores for the technical replicates in staining FFPE tissue from 8 patients.
